# Supplementary material for: Skin Autofluorescence Mirrors Surrogate Parameters of Vascular Aging: An Enable Study
Source: MDPI journal article supplement (doi:10.3390/nu15071597), 2023-03-25
Supplement: s1 [file s1]

## Supplementary Material

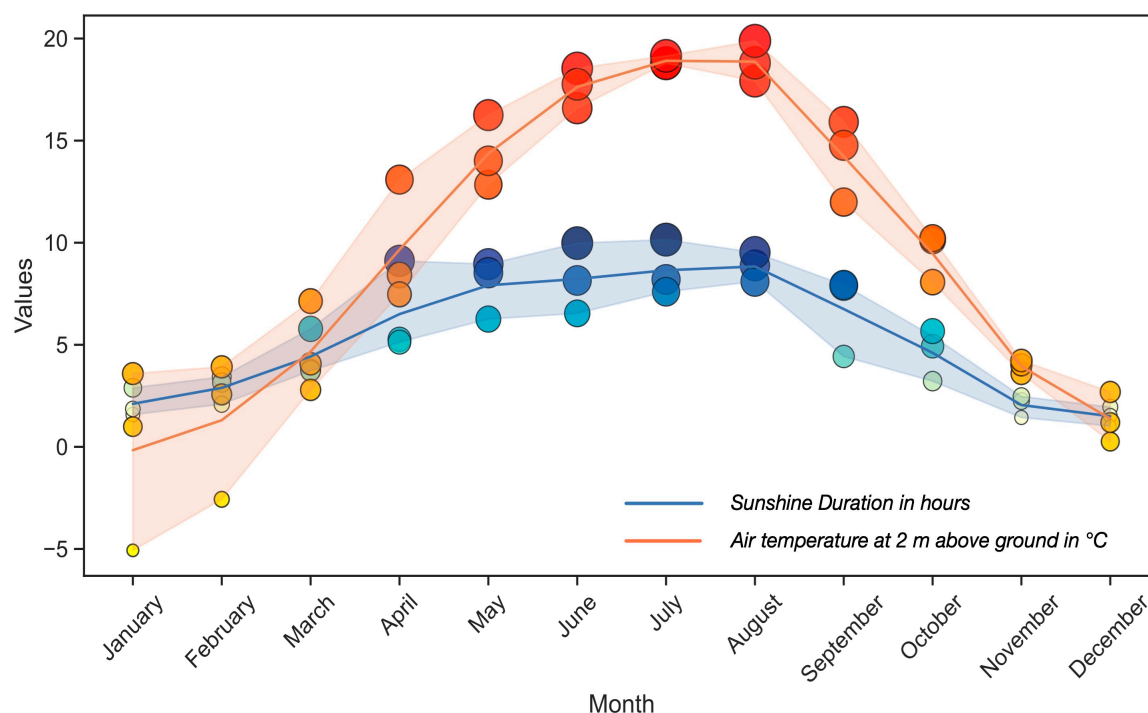

**Supplement Figure S1.** Meteorological data of Weihenstephan-Dürnast, Bavaria Germany from January 2016 to December 2018. Warm colored lines and circles presents monthly mean of station observations of air temperature at 2 m above ground in °C, whereas lines and circles with cool color indicates monthly mean of station observations of sunshine duration in hours. Circle size and color are adjusted upon its temperature and sunshine hours.

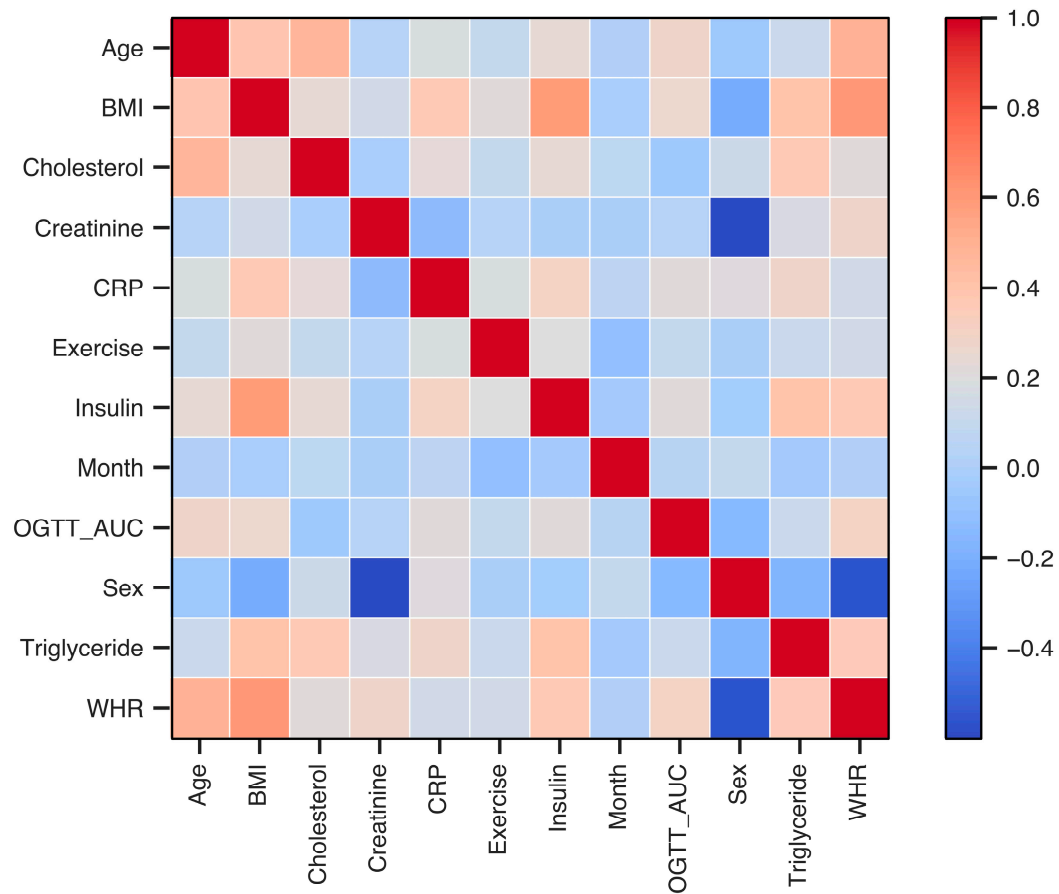

**Supplement Figure S2.** Spearman rho rank correlation of all variables visualized in a heat map. The color bar on the right defines positive and negative pairwise correlations in a cool and warm color. The deeper the color in a square, the stronger the correlation and vice versa.
